# Supplementary material for: The fluorescence imaging and precise suppression of bacterial infections in chronic wounds by porphyrin-based metal–organic framework nanorods
Source: Royal Society of Chemistry journal article supplement (doi:10.1039/d1tb01649k), 2021-01-01
Supplement: d1tb01649k1.pdf [file d1tb01649k1.pdf]

## Supporting Information

### Fluorescent Imaging and Precise Suppression of Bacterial Infection in Chronic Wounds by Porphyrin-Based Metal-Organic Framework Nanorod

Lihua Zhang <sup>a, b, c</sup>, Minzhi Ouyang <sup>d</sup>, Yufei Zhang <sup>c</sup>, Huanxiang Wang <sup>c</sup>, Ziyun Huang <sup>c</sup>, Libei He <sup>c</sup>, Yanli Lei <sup>c</sup>, Zhen Zou <sup>\*c</sup>, Feng Feng <sup>\*a, b</sup>, Ronghua Yang <sup>\*c, e</sup>

<sup>a</sup>School of Chemistry and Material Science, Shanxi Normal University, Linfen 041004, China

<sup>b</sup>College of Chemistry and Environmental Engineering, Shanxi Datong University, Datong 037009, China

<sup>c</sup>Hunan Provincial Key Laboratory of Cytochemistry, School of Chemistry and Food Engineering, Changsha University of Science and Technology, Changsha 410004, China

<sup>d</sup>Department ultrasound diagnosis, The Second Xiangya Hospital, Central South University, Changsha, 410011, P. R. China

<sup>e</sup>College of Chemistry and Chemical Engineering, Hunan Normal University, Changsha 410081, China

\*Corresponding authors email: kobe474779970@126.com; Yangrh@pku.edu.cn

Lihua Zhang, Minzhi Ouyang and Yufei Zhang contributed equally to this work.

# Table of contents

|                                                                                          |      |
|------------------------------------------------------------------------------------------|------|
| <b>Figure S1</b> The FTIR of TCPP and Zn-TCPP nanorods .....                             | S-3  |
| <b>Figure S2</b> Size distribution and photographs of Zn-TCPP in various media. ....     | S-4  |
| <b>Figure S3</b> MTT assay of Zn-TCPP on MCF-7 and L929 cells.....                       | S-5  |
| <b>Figure S4</b> Hemolytic tests of Zn-TCPP with different concentrations.....           | S-6  |
| <b>Figure S5</b> Fluorescence images of MCF-7 cells of incubation with different pH..... | S-7  |
| <b>Figure S6</b> Fluorescence images of <i>in vivo</i> with extend chronic wound .....   | S-8  |
| <b>Figure S7</b> Singlet oxygen release <i>in vitro</i> .....                            | S-9  |
| <b>Figure S8</b> Singlet oxygen release in bacterial.....                                | S-10 |
| <b>Figure S9</b> Select the sterilization area by controlling the laser. ....            | S-11 |
| <b>Figure S10</b> H&E and Masson images of the normal tissues on 1st and 8th day. ....   | S-12 |

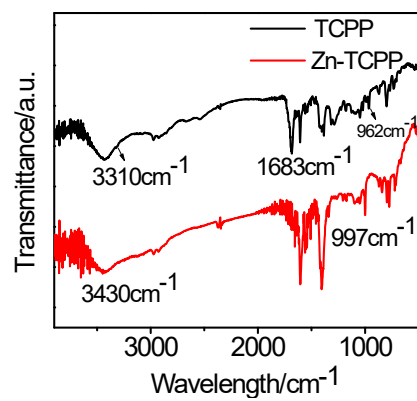

**Figure S1** The FTIR of TCP and Zn-TCP nanorods.

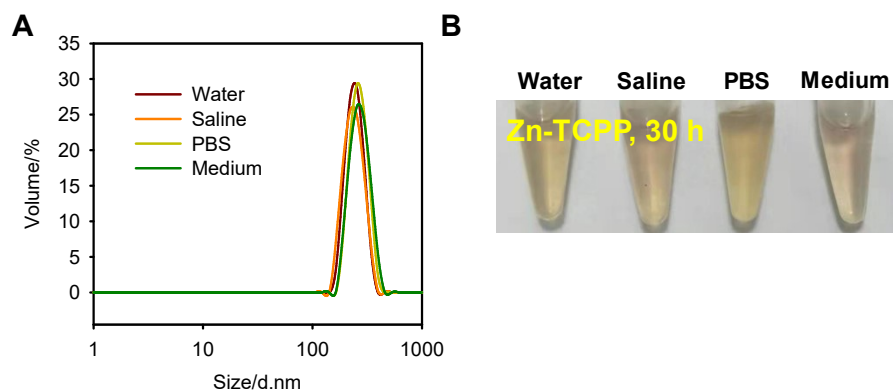

**Figure S2** (A) Size distribution (B) photographs of Zn-TCPP in various aqueous media incubated for 30 h at 37°C.

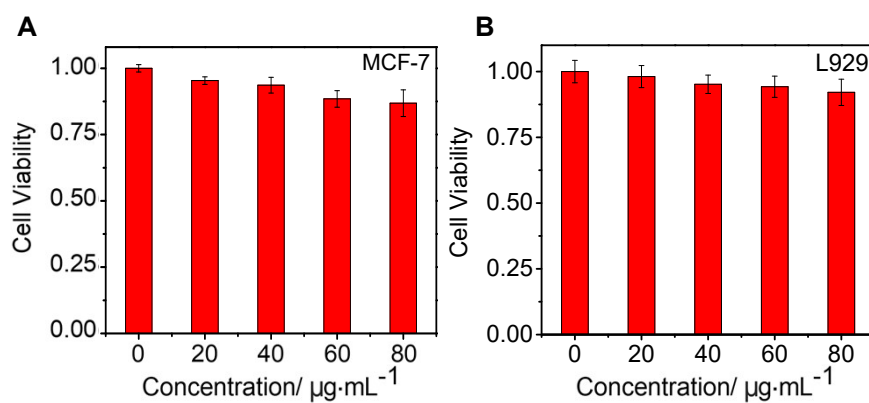

**Figure S3** MTT assay of (A) MCF-7 and (B) L929 cells treated with Zn-TCPP nanorods of different concentrations for 24 h. The error bars were the standard deviations from five independent measures.

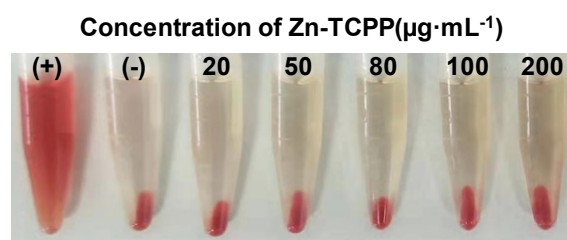

**Figure S4** Hemolytic tests of Zn-TCPP with different concentrations. Ultrapure water and PBS were also used for positive and negative control.

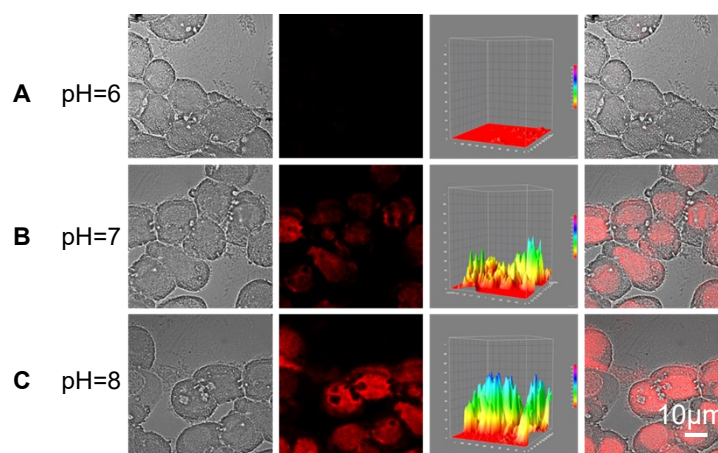

**Figure S5** Fluorescence images of MCF-7 cells of incubation with different pH. (A) pH=6, (B) pH=7, (C) pH=8.

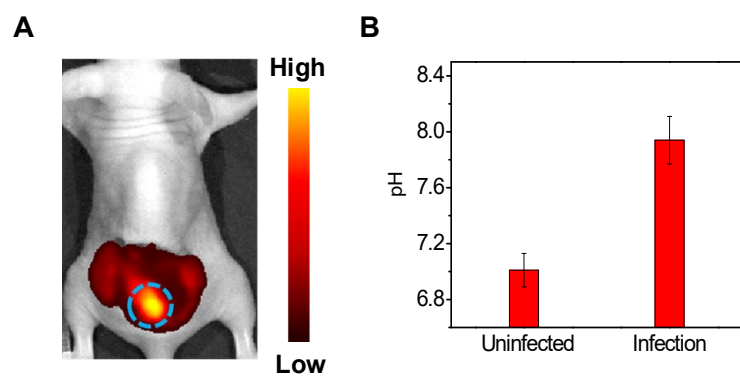

**Figure S6** (A) Fluorescence images of in vivo model with extend chronic wound, the circle area was inoculated with 50  $\mu\text{L}$  *S. aureus* of  $1 \times 10^6$  CFU  $\text{mL}^{-1}$ . (B) The measurement results of pH glass electrodes on different areas of the chronic wound.

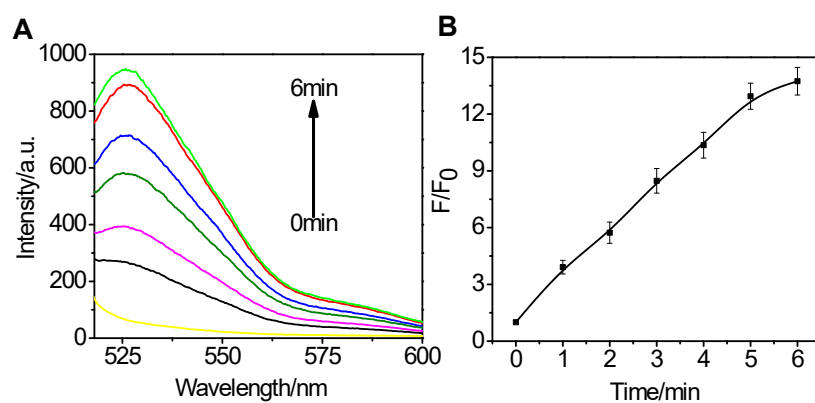

**Figure S7** (A) Fluorescence spectrum and (B) signal-to-back ratio trend of SOSG fluorescent probe treatment with Zn-TCPP nanorods under illumination of near-infrared light ( $\lambda_{ex} = 660$  nm).

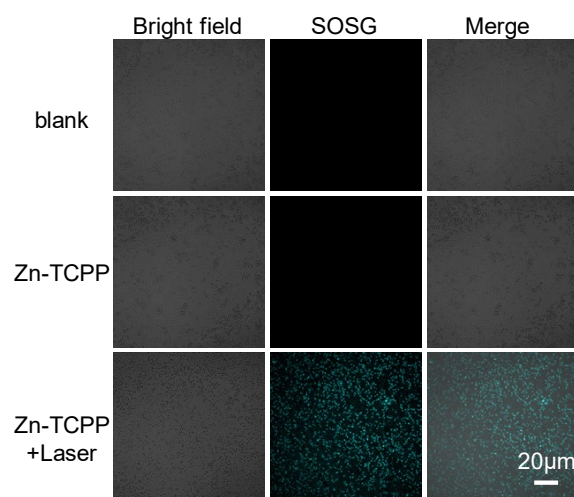

**Figure S8** CLSM of SOSG fluorescent probe treatment with Zn-TCPP nanorods under illumination of near-infrared light ( $\lambda_{\text{ex}} = 660 \text{ nm}$ ).

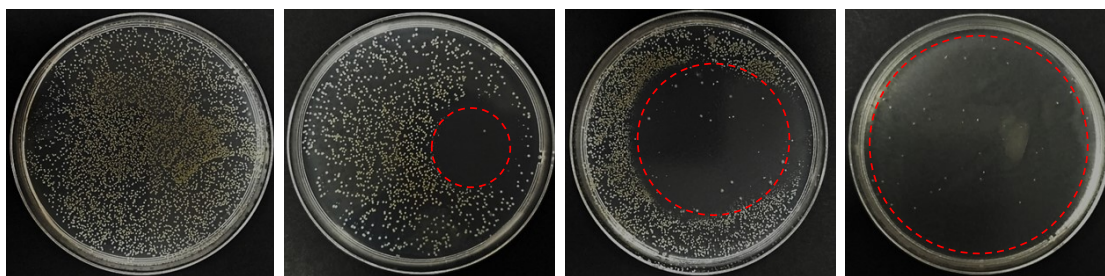

**Figure S9** Local photodynamic inactivation of *Staphylococcus aureus*. The red dotted line range is the illumination range.

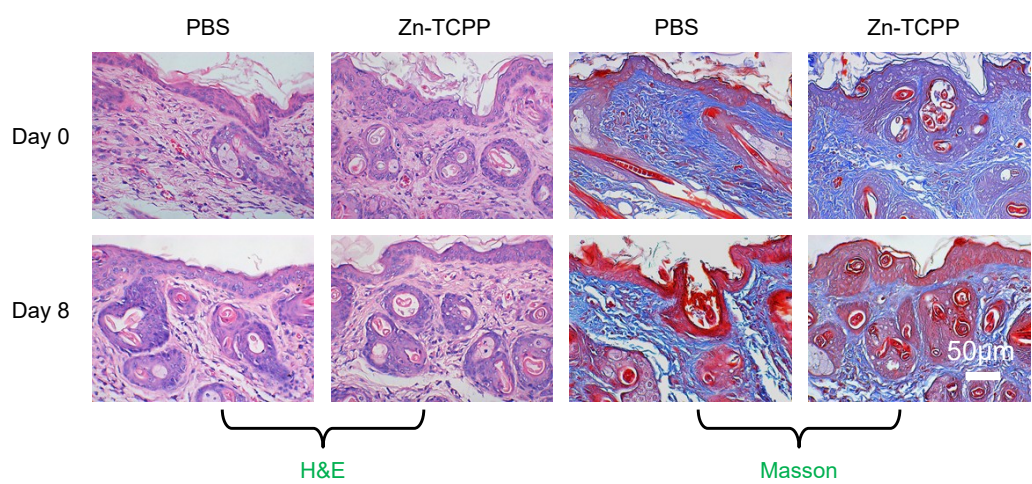

**Figure S10** H&E and Masson images of the normal tissues on the first day and eighth day.
